# Supplementary material
Source: publisher figshare collection journal article supplement (https://rs.figshare.com/ndownloader/files/13731134)
Supplement: Supplementary file 1 [file 13731134]

**Electronic supplementary material for**

**Parent-preferred dispersal promotes cooperation in structured populations**

Xiaojie Chen, Åke Brännström, and Ulf Dieckmann

**1. Results for the original birth-death rule**

In figure S1, we report the fraction of cooperators as a function of the benefit-to-cost ratio  $b/c$  in the three different types of population structures under the birth-death rule with random dispersal mode under which the offspring replaces a random neighbour of the parent. We observe that under the original birth-death rule, cooperators cannot survive in random-regular and small-world networks, even if the benefit-to-cost is high. Furthermore, in scale-free networks just a few cooperators survive when the benefit-to-cost ratio is high. These results show that the original birth-death rule greatly suppresses the evolution of cooperation in social networks [1], even if initially half of the nodes are occupied by cooperators and the benefit-to-cost ratio is high.

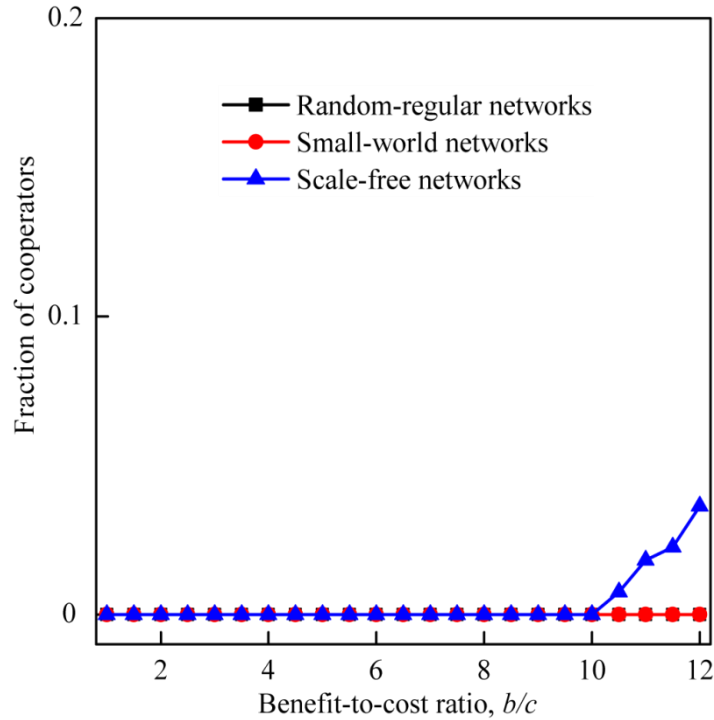

**Figure S1:** Fraction of cooperators as a function of the benefit-to-cost ratio  $b/c$  without offspring-preferred or parent-preferred dispersal, that is,  $\alpha = \beta = 0$ . Under

the birth-death update rule with random dispersal mode, it is extremely difficult for cooperation to evolve in different types of population structures. However, for large benefit-to-cost ratio just a few cooperators can survive in scale-free networks. Here, the intensity of selection  $w$  is fixed at 0.01 and initially each individual is designated either as a cooperator or a defector with equal probability.

## 2. Pair-approximation method for birth-death rule with parent-preferred and offspring-preferred dispersal

By assuming that cooperators are distributed uniformly among the network, we can use the pair-approximation method to theoretically study the evolutionary dynamics of cooperation on regular graphs [1]. Let  $p_C$  and  $p_D$  respectively denote the fractions of cooperators and defectors in the population, so that  $p_C + p_D = 1$ . Let  $p_{CC}$ ,  $p_{CD}$ ,  $p_{DC}$ , and  $p_{DD}$  respectively denote the fractions of  $CC$ ,  $CD$ ,  $DC$ , and  $DD$  links. We have  $p_{CC} + p_{CD} + p_{DC} + p_{DD} = 1$  and  $p_{CD} = p_{DC}$ . Let  $q_{X|Y}$  denote the conditional probability to find an  $X$ -player given that the adjacent node is occupied by a  $Y$ -player. Here, both  $X$  and  $Y$  stand for  $C$  or  $D$ . Then we have  $p_{XY} = q_{X|Y}p_Y$  and  $q_{C|X} + q_{D|X} = 1$ . As a result, based on the relationships of the quantities, we can see that the dynamics of the system can be described by only two quantities,  $p_C$  and  $p_{CC}$ .

Now, let us consider the probability that a player is selected for reproduction in a regular graph with the number of neighbours  $k$ . We know that the fitness of a cooperator who has  $k_C$  cooperative neighbours and  $k_D = k - k_C$  defective neighbours is  $f_C = e^{w(k_C M_{11} + k_D M_{12})}$ , and hence the probability that such cooperators are selected for reproduction is proportional to

$$A = p_C \binom{k}{k_C} q_{C|C}^{k_C} q_{D|C}^{k_D} f_C. \quad (1)$$

Similarly, the fitness of a defector who has  $k_C$  cooperative neighbours and  $k_D$  defective neighbours is  $f_D = e^{w(k_C M_{21} + k_D M_{22})}$ , and hence the probability that such defectors are selected for reproduction is proportional to

$$B = p_D \binom{k}{k_C} q_{C|D}^{k_C} q_{D|D}^{k_D} f_D. \quad (2)$$

Next, we consider the probability that a player's offspring chooses a neighbour to replace. During the replacement process, the parent can explore the expected fitness in four different situations. In the first situation when a cooperator's offspring

replaces a cooperative neighbour we have

$$f_{P(C \rightarrow C)} = e^{w(k_C M_{11} + k_D M_{12})},$$

and

$$f_{O(C \rightarrow C)} = e^{w[M_{11} + (k-1)q_{C|C}M_{11} + (k-1)q_{D|C}M_{12}]},$$

respectively representing the expected fitness of the cooperative parent and its offspring.

In the second situation when a cooperator's offspring replaces a defective neighbour, we have

$$f_{P(C \rightarrow D)} = e^{w[(k_C + 1)M_{11} + (k_D - 1)M_{12}]},$$

and

$$f_{O(C \rightarrow D)} = e^{w[M_{11} + (k-1)q_{C|D}M_{11} + (k-1)q_{D|D}M_{12}]},$$

respectively represent the expected fitness of the cooperative parent and its offspring.

In the third situation when a defector's offspring replaces a cooperative neighbour, we have

$$f_{P(D \rightarrow C)} = e^{w[(k_C - 1)M_{21} + (k_D + 1)M_{22}]},$$

and

$$f_{O(D \rightarrow C)} = e^{w[(k-1)q_{C|C}M_{21} + (k-1)q_{D|C}M_{22} + M_{22}]},$$

respectively represent the expected fitness of the defective parent and its offspring.

In the fourth situation when a defector's offspring replaces a defective neighbour, we have

$$f_{P(D \rightarrow D)} = e^{w(k_C M_{21} + k_D M_{22})},$$

and

$$f_{O(D \rightarrow D)} = e^{w[(k-1)q_{C|D}M_{21} + (k-1)q_{D|D}M_{22} + M_{22}]},$$

respectively represent the expected fitness of the defective parent and its offspring.

Based on the information from the four different situations, the probability that a cooperator's offspring chooses to replace a defective neighbour is given by

$$\frac{k_D f_{O(C \rightarrow D)}^\alpha f_{P(C \rightarrow D)}^\beta}{k_D f_{O(C \rightarrow D)}^\alpha f_{P(C \rightarrow D)}^\beta + k_C f_{O(C \rightarrow C)}^\alpha f_{P(C \rightarrow C)}^\beta}.$$

As a result,  $p_C$  increases by  $1/N$  with probability

$$\text{Prob}(\Delta p_C = \frac{1}{N}) = \sum_{k_C+k_D=k} A \frac{k_D f_{O(C \rightarrow D)}^\alpha f_{P(C \rightarrow D)}^\beta}{k_D f_{O(C \rightarrow D)}^\alpha f_{P(C \rightarrow D)}^\beta + k_C f_{O(C \rightarrow C)}^\alpha f_{P(C \rightarrow C)}^\beta}.$$

Correspondingly, the number of  $CC$  pairs increases by  $1 + q_{C|D}(k - 1)$  and  $p_{CC}$  increases by  $2[1 + q_{C|D}(k - 1)]/(kN)$  with probability

$$\text{Prob}(\Delta p_{CC} = \frac{2[1 + q_{C|D}(k - 1)]}{kN}) = A \frac{k_D f_{O(C \rightarrow D)}^\alpha f_{P(C \rightarrow D)}^\beta}{k_D f_{O(C \rightarrow D)}^\alpha f_{P(C \rightarrow D)}^\beta + k_C f_{O(C \rightarrow C)}^\alpha f_{P(C \rightarrow C)}^\beta}.$$

Similarly, the probability that a defector's offspring chooses to replace a cooperative neighbour is given by

$$\frac{k_C f_{O(D \rightarrow C)}^\alpha f_{P(D \rightarrow C)}^\beta}{k_C f_{O(D \rightarrow C)}^\alpha f_{P(D \rightarrow C)}^\beta + k_D f_{O(D \rightarrow D)}^\alpha f_{P(D \rightarrow D)}^\beta}.$$

As a result,  $p_C$  decreases by  $1/N$  with probability

$$\text{Prob}(\Delta p_C = -\frac{1}{N}) = \sum_{k_C+k_D=k} B \frac{k_C f_{O(D \rightarrow C)}^\alpha f_{P(D \rightarrow C)}^\beta}{k_C f_{O(D \rightarrow C)}^\alpha f_{P(D \rightarrow C)}^\beta + k_D f_{O(D \rightarrow D)}^\alpha f_{P(D \rightarrow D)}^\beta}.$$

Correspondingly, the number of  $CC$  pairs decreases by  $(k - 1)q_{C|C}$  and  $p_{CC}$  decreases by  $2(k - 1)q_{C|C}/(kN)$  with probability

$$\text{Prob}(\Delta p_{CC} = -\frac{2(k - 1)q_{C|C}}{kN}) = B \frac{k_C f_{O(D \rightarrow C)}^\alpha f_{P(D \rightarrow C)}^\beta}{k_C f_{O(D \rightarrow C)}^\alpha f_{P(D \rightarrow C)}^\beta + k_D f_{O(D \rightarrow D)}^\alpha f_{P(D \rightarrow D)}^\beta}.$$

Combining the two probability calculations above, we have

$$\begin{aligned} \dot{p}_C &= \frac{1}{N} \cdot \text{Prob}(\Delta p_C = \frac{1}{N}) - \frac{1}{N} \cdot \text{Prob}(\Delta p_C = -\frac{1}{N}) \\ &= \frac{1}{N} \sum_{k_C=0}^k A \frac{k_D f_{O(C \rightarrow D)}^\alpha f_{P(C \rightarrow D)}^\beta}{k_D f_{O(C \rightarrow D)}^\alpha f_{P(C \rightarrow D)}^\beta + k_C f_{O(C \rightarrow C)}^\alpha f_{P(C \rightarrow C)}^\beta} \\ &\quad - \frac{1}{N} \sum_{k_C=0}^k B \frac{k_C f_{O(D \rightarrow C)}^\alpha f_{P(D \rightarrow C)}^\beta}{k_C f_{O(D \rightarrow C)}^\alpha f_{P(D \rightarrow C)}^\beta + k_D f_{O(D \rightarrow D)}^\alpha f_{P(D \rightarrow D)}^\beta}, \end{aligned} \quad (3)$$

and

$$\begin{aligned} \dot{p}_{CC} &= \sum_{k_C+k_D=k} \frac{2[1 + q_{C|D}(k - 1)]}{kN} \text{Prob}(\Delta p_{CC} = \frac{2[1 + q_{C|D}(k - 1)]}{kN}) \\ &\quad - \sum_{k_C+k_D=k} \frac{2(k - 1)q_{C|C}}{kN} \text{Prob}(\Delta p_{CC} = -\frac{2(k - 1)q_{C|C}}{kN}) \end{aligned}$$

$$\begin{aligned}
&= \sum_{k_C=0}^k \frac{2[1 + q_{C|D}(k-1)]}{kN} A \frac{k_D f_{0(C \rightarrow D)}^\alpha f_{P(C \rightarrow D)}^\beta}{k_D f_{0(C \rightarrow D)}^\alpha f_{P(C \rightarrow D)}^\beta + k_C f_{0(C \rightarrow C)}^\alpha f_{P(C \rightarrow C)}^\beta} \\
&\quad - \sum_{k_C=0}^k \frac{2(k-1)q_{C|C}}{kN} B \frac{k_C f_{0(D \rightarrow C)}^\alpha f_{P(D \rightarrow C)}^\beta}{k_C f_{0(D \rightarrow C)}^\alpha f_{P(D \rightarrow C)}^\beta + k_D f_{0(D \rightarrow D)}^\alpha f_{P(D \rightarrow D)}^\beta}. \quad (4)
\end{aligned}$$

After the variable substitution, we use numerical integration to solve the two differential equations above for  $p_C$ . Figure 2 shows the cooperation level depending on offspring-preferred dispersal strength  $\alpha$  and parent-preferred dispersal strength  $\beta$  as predicted by this pair-approximation method.

### 3. Death-birth update rule with parent-preferred and offspring-preferred dispersal

Initially, each player  $x$  is designated to play either  $C$  or  $D$ , and occupies one site of the network. At each time step, each player  $x$  engages in pairwise interactions with all its adjacent neighbours, and then collects its payoff  $P_x$  based on the payoff matrix parameters. Furthermore, player  $x$  obtains its fitness associated with the payoff information, given as

$$f_x = e^{wP_x},$$

where  $w$  is the intensity of selection.

After playing the games, a random individual  $x$  is chosen to die, and subsequently the neighbours compete for the empty site. The probability that each neighbour  $y$  competes for the empty site is defined as

$$d_{y(x)} = \frac{f_{x(y \rightarrow x)}^\alpha f_{y(y \rightarrow x)}^\beta}{\sum_{z \in \Omega_y} f_{z(y \rightarrow z)}^\alpha f_{y(y \rightarrow z)}^\beta},$$

where the sum in the denominator is over all the neighbours of  $y$  ( $\Omega_y$  is the set of neighbours of individual  $y$ ),  $f_{z(y \rightarrow z)}$  denotes the expected fitness of individual  $z$  when the offspring of individual  $y$  occupies the site of neighbour  $z$ , and  $f_{y(y \rightarrow z)}$  denotes the expected fitness of individual  $y$  when the offspring of individual  $y$  occupies the site of neighbour  $z$ . Here,  $\alpha$  ( $\alpha > 0$ ) represents the offspring-preferred dispersal strength,  $\beta$  ( $\beta > 0$ ) represents the parent-preferred dispersal strength, and  $d_{y(x)}$  characterizes the desirability strength of the offspring of individual  $y$  to move into the site of individual  $x$ .

Based on the neighbour's desirability strength, the probability that individual  $y$

can occupy the site of individual  $x$  is

$$P_{y \rightarrow x} = \frac{d_{y(x)} f_y}{\sum_{i \in \Omega_x} d_{i(x)} f_i},$$

where the sum in the denominator is over all the neighbours of  $x$  ( $\Omega_x$  is the set of neighbours of individual  $x$ ), and  $f_i$  denotes the obtained fitness of individual  $i$  from the interactions with its current neighbours. Here,  $d_{i(x)} \times f_i$  represents the competition strength of individual  $i$  for the site of individual  $x$ . And when  $\alpha = 0$  and  $\beta = 0$ , this rule recovers the original death-birth update rule [2].

#### 4. Imitation update rule with parent-preferred and offspring-preferred dispersal

Initially, each player is designated to play either  $C$  or  $D$ , and occupies one site of the network. At each time step, each player  $x$  engages in pairwise interactions with all its adjacent neighbours, and then collects its payoff  $P_x$  based on the payoff matrix parameters. Furthermore, player  $x$  obtains its fitness associated with the payoff information, given as

$$f_x = e^{wP_x},$$

where  $w$  is the intensity of selection.

After playing the games, a random individual  $x$  is chosen to evaluate its strategy. It will either stay with its own strategy or imitate a neighbour's strategy. The probability that each neighbour  $y$  enforces its strategy to individual  $x$  is defined as

$$d_{y(x)} = \frac{f_{x(y \rightarrow x)}^\alpha f_{y(y \rightarrow x)}^\beta}{\sum_{z \in \Omega_y} f_{z(y \rightarrow z)}^\alpha f_{y(y \rightarrow z)}^\beta},$$

where the sum in the denominator is over all the neighbours of individual  $y$  ( $\Omega_y$  is the set of neighbours of individual  $y$  including individual  $y$ ),  $f_{z(y \rightarrow z)}$  denotes the expected fitness of individual  $z$  when the individual  $y$  enforces its strategy to individual  $z$  successfully, and  $f_{y(y \rightarrow z)}$  denotes the expected fitness of individual  $y$  when individual  $y$  enforces its strategy to individual  $z$  successfully. Here,  $\alpha$  ( $\alpha > 0$ ) represents the offspring-preferred dispersal strength,  $\beta$  ( $\beta > 0$ ) represents the parent-preferred dispersal strength, and  $d_{y(x)}$  characterizes the desirability strength of individual  $y$  to enforce its strategy to individual  $x$ .

Based on the neighbour's desirability strength, the probability that the

neighbour  $y$  can enforce its strategy to individual  $x$  is

$$P_{y \rightarrow x} = \frac{d_{y(x)} f_y}{\sum_{i \in \Omega_x} d_{i(x)} f_i},$$

where the sum in the denominator is over all the neighbours of  $x$  ( $\Omega_x$  is the set of neighbours of individual  $x$  including individual  $x$  itself),  $f_i$  denotes the obtained fitness of individual  $i$  from the interactions with its current neighbours. Here,  $d_{i(x)} \times f_i$  represents the competition strength of individual  $i$  to enforce its strategy to individual  $x$ . And when  $\alpha = 0$  and  $\beta = 0$ , this rule recovers the original imitation update rule [2].

## 5. Pairwise comparison update rule with parent-preferred and offspring-preferred dispersal

Initially, each player is designated to play either  $C$  or  $D$ , and occupies one site of the network. At each time step, each player  $x$  engages in pairwise interactions with all its adjacent neighbours, and then collects its payoff  $P_x$  based on the payoff matrix parameters. Furthermore, player  $x$  obtains its fitness associated with the payoff information, given as

$$f_x = e^{w P_x},$$

where  $w$  is the intensity of selection.

After playing the games, a random individual  $x$  is chosen to evaluate its strategy, and one of the neighbours  $y$  is chosen to teach individual  $x$  proportion to the neighbour's desirability. Here, we define neighbour  $y$ 's desirability as

$$d_{y(x)} = \frac{f_{x(y \rightarrow x)}^\alpha f_{y(y \rightarrow x)}^\beta}{\sum_{z \in \Omega_y} f_{z(y \rightarrow z)}^\alpha f_{y(y \rightarrow z)}^\beta},$$

where the sum in the denominator is over all the neighbours of individual  $y$  ( $\Omega_y$  is the set of neighbours of individual  $y$ ),  $f_{z(y \rightarrow z)}$  denotes the expected fitness of individual  $z$  when individual  $y$  enforces its strategy to individual  $z$  successfully, and  $f_{y(y \rightarrow z)}$  denotes the expected fitness of individual  $y$  when individual  $y$  enforces its strategy to individual  $z$  successfully. Here,  $\alpha$  ( $\alpha > 0$ ) represents the offspring-preferred dispersal strength, and  $\beta$  ( $\beta > 0$ ) represents the parent-preferred dispersal strength.

After the neighbour  $y$  is chosen, player  $x$  adopts individual  $y$ 's strategy with a probability depending on the fitness difference as

$$P_{y \rightarrow x} = \frac{1}{1 + \exp[(f_x - f_y)/\kappa]},$$

where  $\kappa$  is the uncertainty by strategy adoptions. Without losing generality, we set  $\kappa = 1.0$  in this study. And when  $\alpha = 0$  and  $\beta = 0$ , this rule recovers the original pairwise comparison update rule [2].

## 6. Results for the three other update rules with parent-preferred and offspring-preferred dispersal

In figure S2, we report how the fraction of cooperators depends on the offspring-preferred dispersal strength  $\alpha$  and the parent-preferred dispersal strength  $\beta$  for three other update rules (death-birth, imitation, and pairwise comparison update rules), when parent-preferred and offspring-preferred dispersal modes are considered. We still find that under these three different update rules the parent-preferred dispersal way can promote the evolution of cooperation in different types of population structures, and in scale-free networks cooperation can be enhanced for intermediate offspring-preferred dispersal strength when the parent-preferred dispersal strength is not high. These results show that our main results about effects of parent-preferred and offspring-preferred dispersal are robust against the considered changes of the update rules.



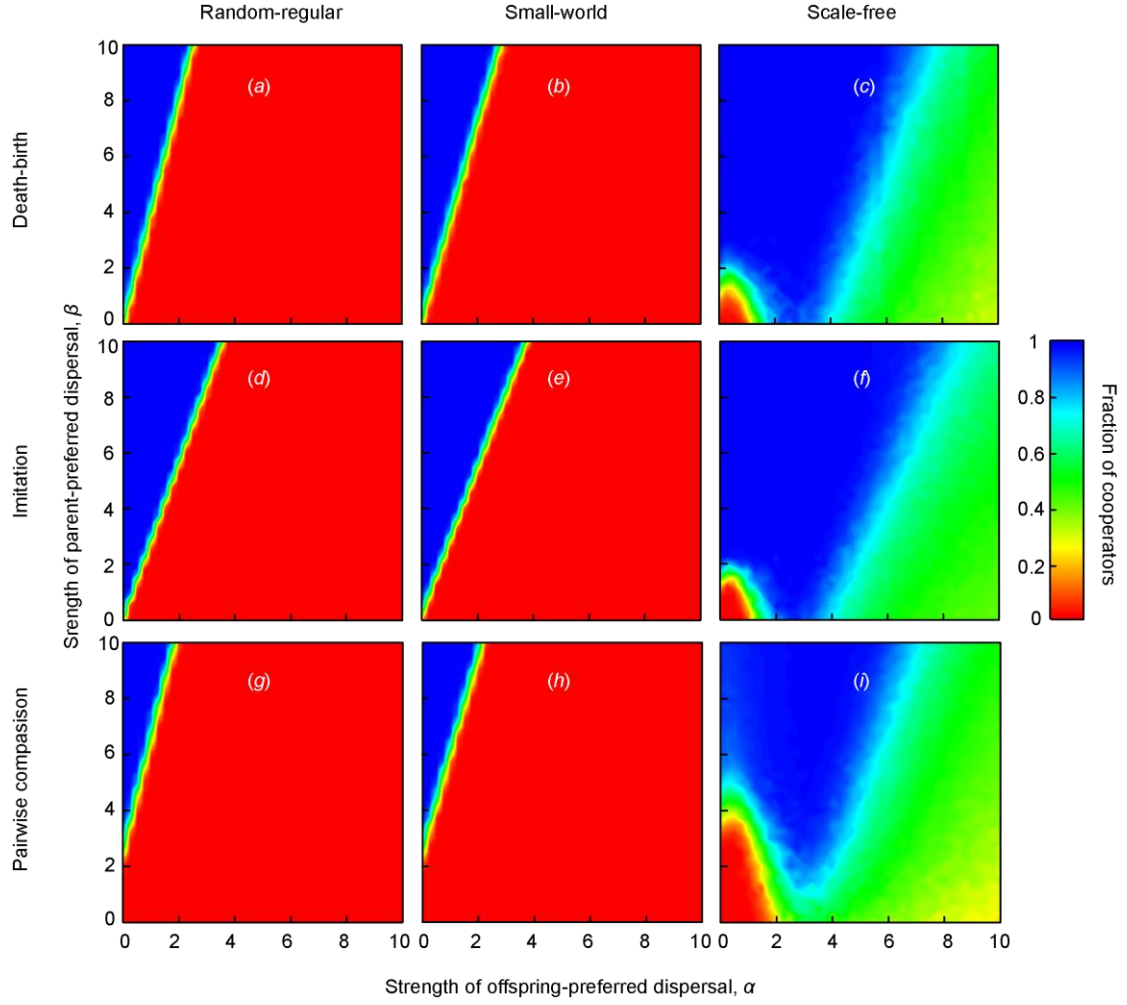

**Figure S2:** Impact of the strengths of parent-preferred and offspring-preferred dispersal on the fraction of cooperators for different update rules and population structures. Top row depicts the fraction of cooperators depending on offspring-preferred dispersal strength  $\alpha$  and parent-preferred dispersal strength  $\beta$  in a contour plot form under death-birth update rule in random-regular (a), small-world (b), and scale-free (c) networks, respectively. Middle row depicts the fraction of cooperators depending on offspring-preferred dispersal strength  $\alpha$  and parent-preferred dispersal strength  $\beta$  in a contour plot form under imitation rule in random-regular (d), small-world (e), and scale-free (f) networks, respectively. Bottom row depicts the fraction of cooperators depending on offspring-preferred dispersal strength  $\alpha$  and parent-preferred dispersal strength  $\beta$  in a contour plot form under pairwise comparison rule in random-regular (g), small-world (h), and scale-free (i) networks, respectively. Here,  $w = 0.01$  and  $b/c = 4$ . Initially each individual is designated either as a cooperator or a defector with equal probability, and under the pairwise comparison update rule  $\kappa = 1.0$ .

## References

- [1] Ohtsuki H, Hauert C, Lieberman E, Nowak MA. 2006 A simple rule for the evolution of cooperation on graphs and social networks. *Nature* **441**, 502-505. (doi:10.1038/nature04605)
- [2] Ohtsuki H, Nowak MA. 2006 The replicator equation on graphs. *J. Theor. Biol.* **243**, 86-97. (10.1016/j.jtbi.2006.06.004)
